# Supplementary material for: Observed Changes in Meteorological Drought Events during 1981–2020 over Rwanda, East Africa
Source: MDPI journal article supplement (doi:10.3390/su14031519), 2022-01-28
Supplement: s1 [file s1]

## List of supplementary Figures and Tables

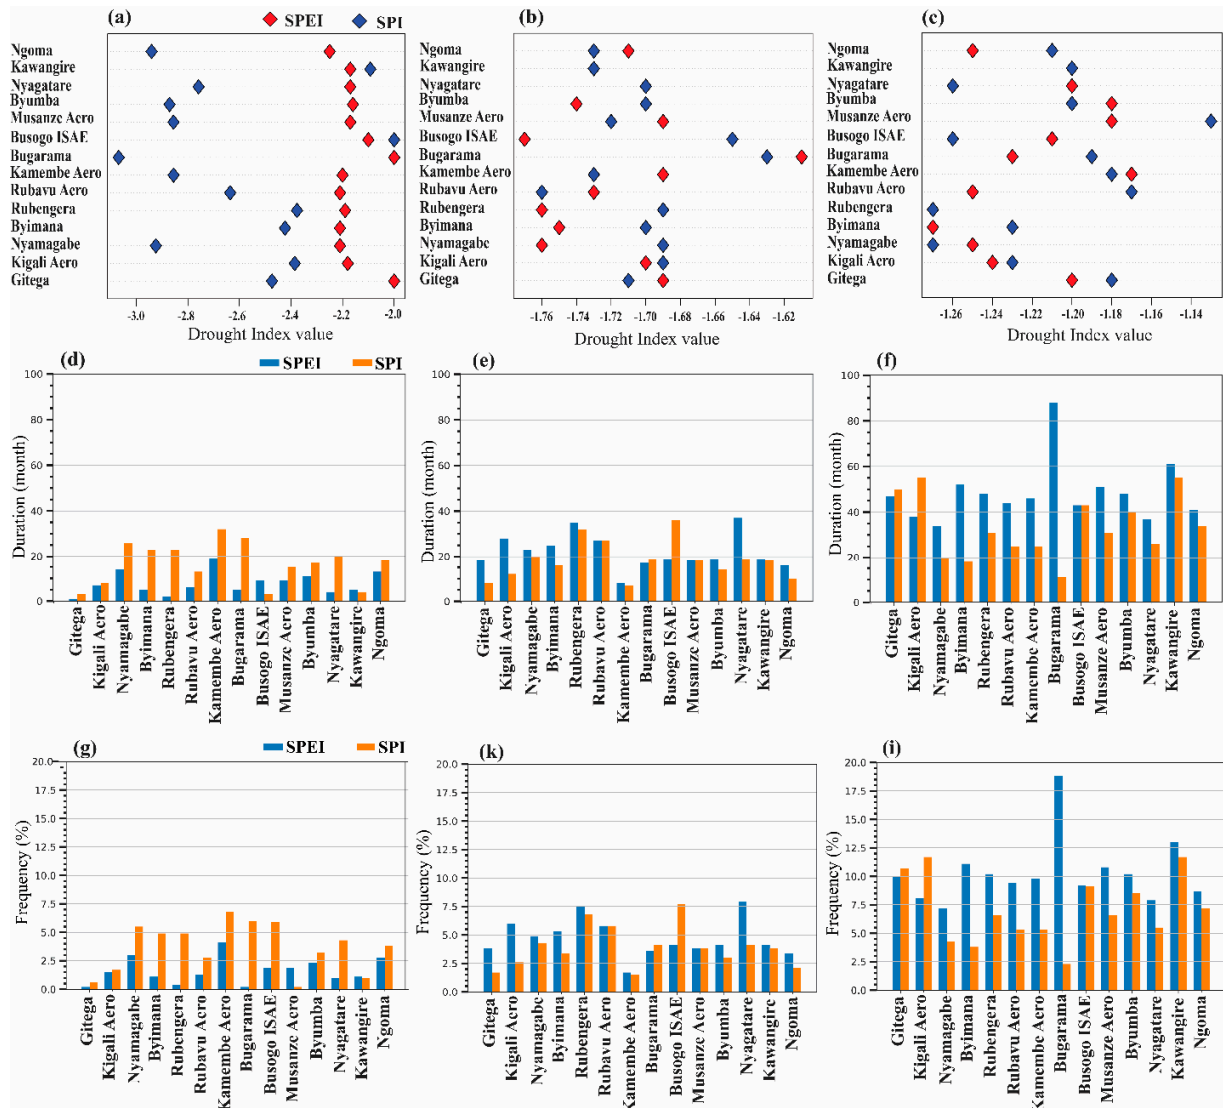

Figure S1. Variations of the characteristics of SPEI and SPI indices at 12-month time scale under Extreme drought category (SPEI/SPI ≤ -2) for all stations used in this study from 1981-2020. The characteristics considered here are Intensity (a,b,c), Duration (d,e,f) and Frequency (g,h,i).

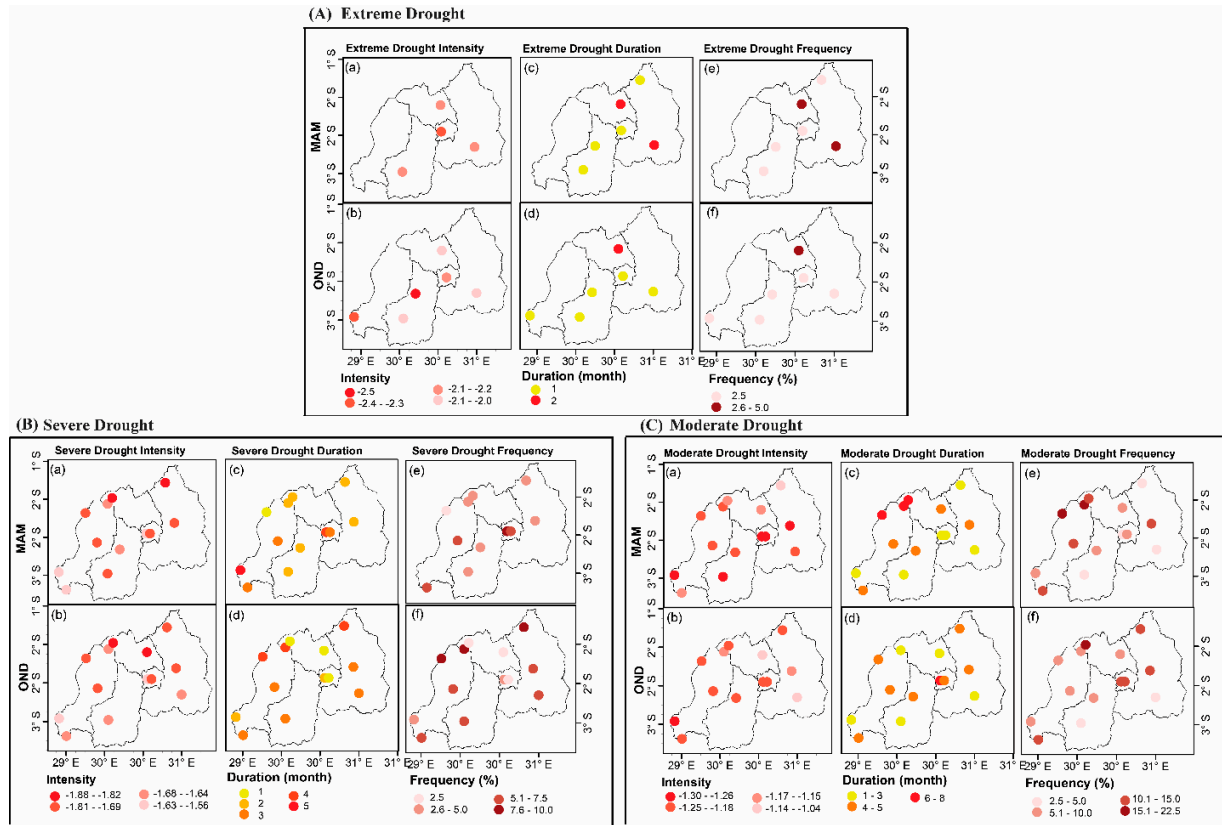

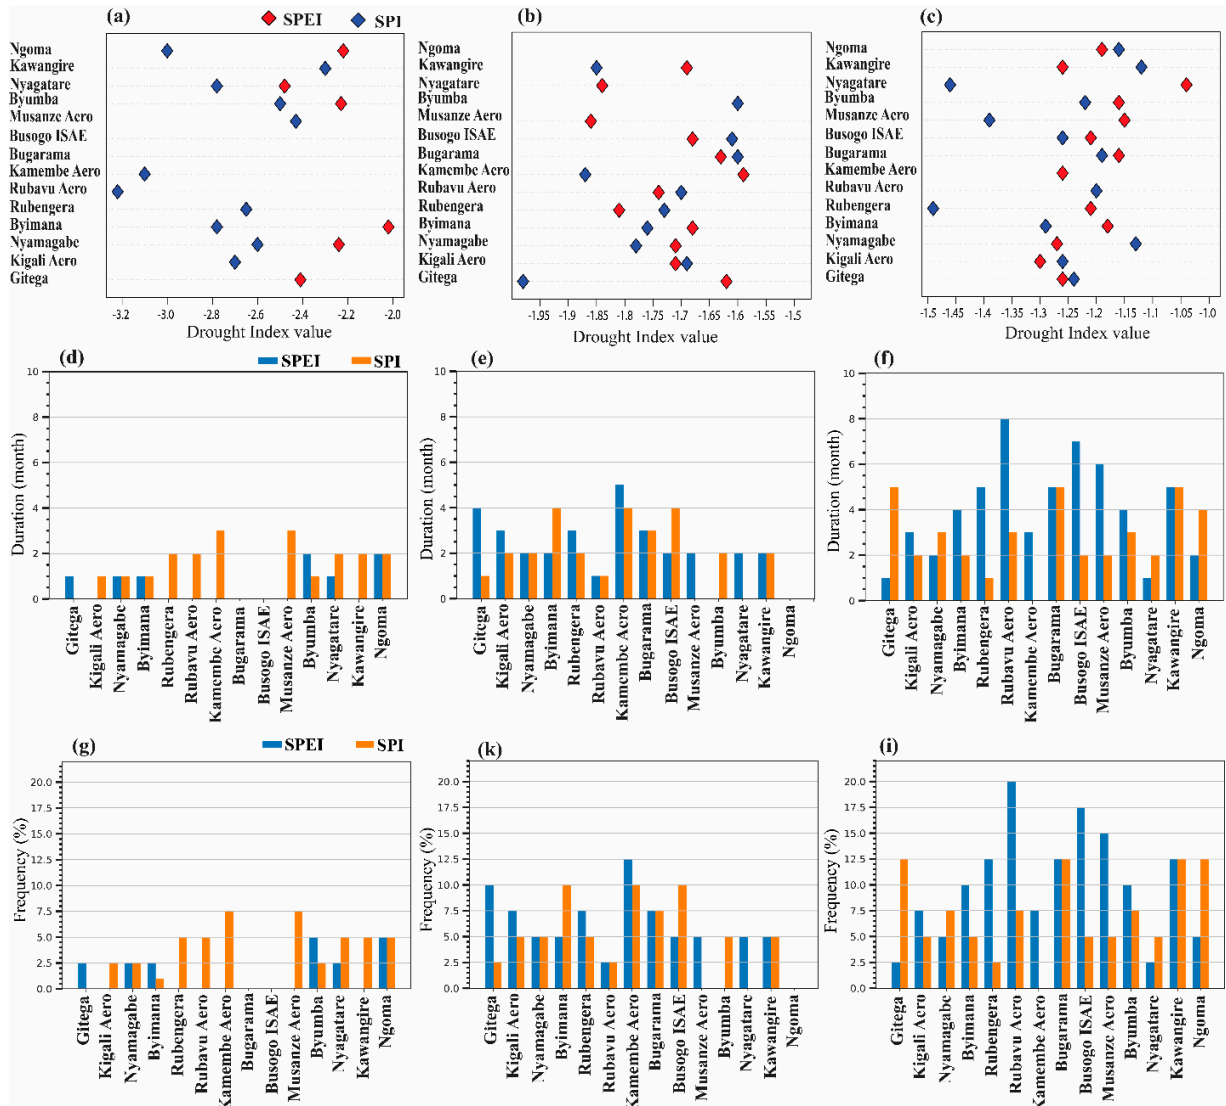

Figure S3: The MAM seasonal characteristics of SPEI and SPI at 3-month from 1981 to 2020. The characteristics considered here are Intensity (a,b,c), Duration (d,e,f) and Frequency (g,h,i).

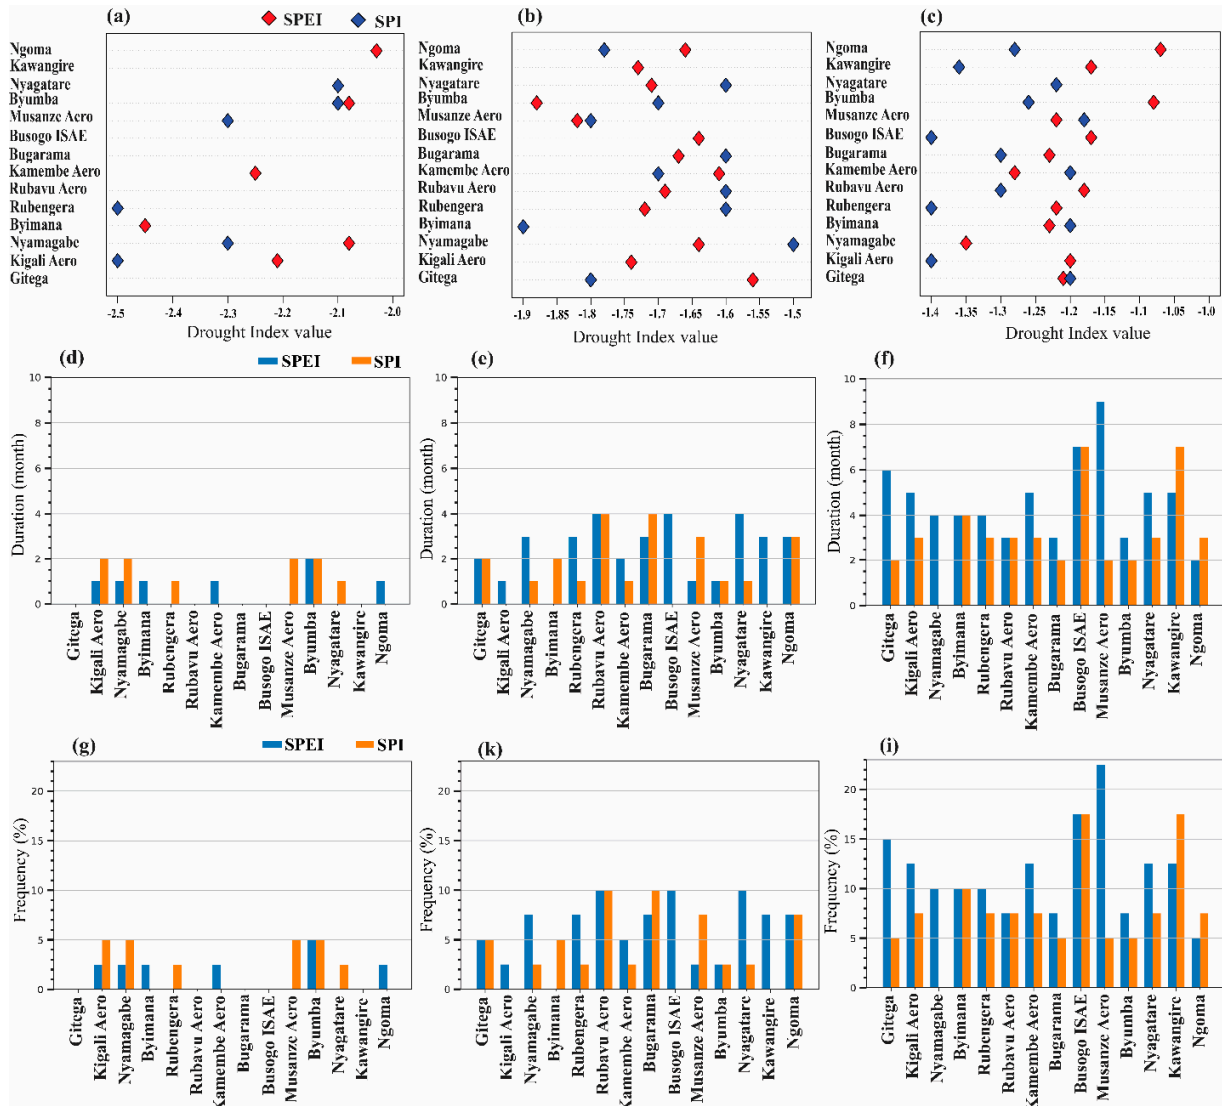

Figure S4: The same as Figure S3 but during OND season. The characteristics considered here are Intensity (a,b,c), Duration (d,e,f) and Frequency (g,h,i).

Table S1: The correlation between SPI and SPEI at 3 and 12-month time scales for all stations used in this study.

| Stations     | 3 Month | 12 Month |
|--------------|---------|----------|
| Gitega       | 0.94    | 0.96     |
| Kigali Aero  | 0.91    | 0.91     |
| Nyamagabe    | 0.96    | 0.94     |
| Byimana      | 0.90    | 0.86     |
| Rubengera    | 0.90    | 0.92     |
| Rubavu Aero  | 0.96    | 0.91     |
| Kamembe Aero | 0.93    | 0.87     |

|                     |      |      |
|---------------------|------|------|
| <b>Busogo ISAE</b>  | 0.79 | 0.78 |
| <b>Musanze Aero</b> | 0.96 | 0.96 |
| <b>Byumba</b>       | 0.85 | 0.78 |
| <b>Nyagatare</b>    | 0.88 | 0.88 |
| <b>Kawangire</b>    | 0.76 | 0.77 |
| <b>Ngoma</b>        | 0.87 | 0.84 |
| <b>Bugarama</b>     | 0.75 | 0.74 |
