# Supplementary material for: Observed Changes in Meteorological Drought Events during 1981–2020 over Rwanda, East Africa
Source: MDPI journal article supplement (doi:10.3390/su14031519), 2022-01-28
Supplement: s1 [file s1]

Archive with 1 entries (1 files):
- sustainability-1525128-supplementary.pdf
